# Supplementary material for: Analytical Determination of Heavy Metals in Human Seminal Plasma—A Systematic Review
Source: MDPI journal article supplement (doi:10.3390/life13040925), 2023-03-31
Supplement: s1 [file s1]

**Table S1.** Equipment specifications for heavy metal quantification by AAS. n.a: not available.

| Ref. | Equipment specifications                                                                                                    |
|------|-----------------------------------------------------------------------------------------------------------------------------|
| [19] | n.a                                                                                                                         |
| [27] | Perkin Elmer 3110, Model: Graphite Furnace Vario 6                                                                          |
| [28] | Perkin Elmer, USA                                                                                                           |
| [29] | Perkin Elmer precisely Analyst 200                                                                                          |
| [32] | Perkin and Elmer model 305                                                                                                  |
| [35] | PerkinElmer AAnalyst400 (PerkinElmer, USA)                                                                                  |
| [41] | Unicam 929 and 939OZ Atomic Absorption Spectrometers with GF90 and GF90Z                                                    |
| [42] | Unicam 929 and 939OZ Atomic Absorption Spectrometers with GF90 and GF90Z                                                    |
| [43] | n.a                                                                                                                         |
| [46] | n.a                                                                                                                         |
| [47] | Buck model 210 VGP (Buck Scientific, Inc., Norwalk, CT)                                                                     |
| [48] | Buck model 210 VGP (Buck Scientific Inc., Norwalk, CT, USA)                                                                 |
| [49] | Zeeman 5000 atomic absorption spectrophotometer, HGA 500; Perkin Elmer, Norwalk, CT, USA)                                   |
| [56] | YOUNGLIN AAS 8020 (Hogye dong, Anyang, South Korea)                                                                         |
| [57] | Varian spectra 250 (Australia)                                                                                              |
| [58] | DMA-80 Direct Mercury Analyzer (Milestone, Shelton CT, USA)                                                                 |
| [59] | n.a                                                                                                                         |
| [60] | Zeenit 700-Analytik-Jena Flame and Graphite-Furnace AAS (Germany), equipped with deuterium and Zeeman background correction |
| [61] | Perkin Elmer Zeeman 5100PC (Perkin-Elmer GmbH, Rodgau, Germany) provided with an HGA 600 graphite furnace programmer        |
| [62] | Varian spectraAA 200Z (USA)                                                                                                 |
| [63] | Varian Spectra 250 (Australia)                                                                                              |
| [64] | AAnalyst800 (Perkin Elmer, LabX, Midland, Canada)                                                                           |
| [65] | Buck Model 210-VGI (Buck Scientific, East Norwalk, CT)                                                                      |
| [66] | n.a                                                                                                                         |
| [67] | n.a                                                                                                                         |
| [68] | n.a                                                                                                                         |
| [69] | Analyst 100 apparatus (Perkin-Elmer Life and Analytical Sciences, Shelton, CT, USA)                                         |
| [70] | Zeenit 700-Analytik-Jena equipped with deuterium and Zeeman background correction (Germany)                                 |
| [71] | Olympus AU 680 autoanalyzer (Beckman Coulter, Tokyo, Japan)                                                                 |
| [72] | SpectrAA-200Z (Varian, Palo Alto, CA) with Zeeman's background correction and an L'vov platform                             |
| [73] | n.a                                                                                                                         |
| [74] | n.a                                                                                                                         |
| [75] | n.a                                                                                                                         |
| [76] | n.a                                                                                                                         |
| [77] | n.a                                                                                                                         |

n.a: not available

**Table S2.** Equipment **specifications** for heavy metal quantification by ICP. n.a: not available.

| Ref  | Equipment specifications                                                                 |
|------|------------------------------------------------------------------------------------------|
| [30] | JY 2000                                                                                  |
| [31] | JY 2000                                                                                  |
| [34] | n.a                                                                                      |
| [37] | 700X (Agilent Technologies, USA)                                                         |
| [38] | 7700X (Agilent Technologies, USA)                                                        |
| [40] | 7700 series (Agilent Technologies, USA)                                                  |
| [44] | 7500ce (Agilent Technologies, Santa Clara, CA, USA).                                     |
| [45] | 7500ce (Agilent Technologies, Santa Clara, CA, USA).                                     |
| [50] | 7700 series (Agilent Technologies, Santa Clara, CA, USA).                                |
| [81] | Agilent 7500ce (Agilent Technologies, Germany) equipped with a cell dynamic range (CDR). |
| [82] | 7500cx (Agilent Technologies, Santa Clara, CA, USA).                                     |
| [83] | X Series II (Thermo Electron, Les Ulis, France) employing a collision cell               |
| [84] | Agilent 770 (Agilent Technologies, USA)                                                  |
| [85] | Thermo X Series II                                                                       |
| [86] | SCIEX Elan 6100 DRC (PerkinElmer Instruments, Norwalk, Connecticut)                      |
| [87] | ELAN DRC, II (Perkin Elmer, Waltham, MA)                                                 |
| [88] | Element 2 sector field ICP-MS (Thermo Fisher Scientific, Bremen, Germany).               |
| [89] | n.a                                                                                      |
| [90] | Varian Liberty II axial (Varian Inc. Scientific Instruments, Mulgrave, Australia)        |
| [91] | Agilent 5100 (Agilent Technologies, Santa Clara, CA, USA).                               |

n.a: not available
